# Supplementary material
Source: PubMed Central journal article supplement (PMC3278268)
Supplement: supp_jn.111.149781_nut149781-ST1-ST3.pdf [file supp_jn.111.149781_nut149781-ST1-ST3.pdf]

Supplemental Table 1- Major food sources of iron, Mg and Zn in the MESA population

|                                     |                                                                                                                                                                         |
|-------------------------------------|-------------------------------------------------------------------------------------------------------------------------------------------------------------------------|
| Red meat                            | hamburger; cheeseburger; meatloaf; hash; beef, pork, or lamb steaks; roasts; barbeque or ribs, red meat in stir-fried and other mixed dishes.                           |
| Poultry                             | roasted, broiled, baked, or ground chicken or turkey; fried chicken; poultry in stir-fried and other mixed dishes                                                       |
| Fish                                | shrimp; lobster; crab; oysters, mussels; tuna; salmon; sardines, other broiled, steamed, baked, or raw fish; fish in stir-fried and other mixed dishes                  |
| Whole grain                         | dark, whole-grain breads or rolls; bran muffins; brown or wild rice; oatmeal; high-fiber cold cereal                                                                    |
| Legumes                             | pea, lentil, black bean, and potajes soups; pinto, black, baked, butter, or red beans; black-eyed peas; refried beans; beans in enchiladas, tamales, tacos, or burritos |
| Other vegetables                    | corn, green beans, peas, snow peas, squash, zucchini, asparagus, mixed vegetables, tossed salad with lettuce                                                            |
| Refined-grain bread, rice and pasta | white bread and rolls, white rice, flour or corn tortillas, other hot cereal, noodles or pasta, refined-grain cold cereal                                               |

Supplemental Table 2 - HR and 95 % CI for T2D by increasing quintiles of nutrient intake estimates in 4982 MESA participants<sup>1,2</sup>

|                            | Quintiles of energy-adjusted nutrient intake |                  |                  |                  |                  | P-trend |
|----------------------------|----------------------------------------------|------------------|------------------|------------------|------------------|---------|
|                            | Q1                                           | Q2               | Q3               | Q4               | Q5               |         |
| <i>n</i>                   | 996                                          | 997              | 996              | 996              | 997              |         |
| Heme iron, <i>mg/d</i>     | ≤0.44                                        | 0.45 – 0.63      | 0.64 – 0.80      | 0.81 – 1.06      | ≥1.07            |         |
| Model 1                    | 1.00                                         | 1.03 (0.75,1.43) | 0.89 (0.63,1.25) | 1.03 (0.74,1.44) | 1.18 (0.86,1.62) | 0.27    |
| Model 2                    | 1.00                                         | 1.04 (0.74,1.44) | 0.91 (0.64,1.29) | 1.07 (0.76,1.53) | 1.24 (0.86,1.78) | 0.21    |
| Non-heme iron, <i>mg/d</i> | ≤ 8.5                                        | 8.6 – 9.9        | 10.0 – 11.3      | 11.4 – 13.3      | ≥ 13.4           |         |
| Model 1                    | 1.00                                         | 1.04 (0.75,1.44) | 1.08 (0.77,1.51) | 1.07 (0.75,1.52) | 1.16 (0.80,1.70) | 0.44    |
| Model 2                    | 1.00                                         | 1.05 (0.75,1.47) | 1.08 (0.76,1.53) | 1.08 (0.74,1.57) | 1.24 (0.82,1.89) | 0.31    |
| Zinc, <i>mg/d</i>          | ≤ 6.7                                        | 6.8 – 7.6        | 7.7 – 8.4        | 8.5 – 9.7        | ≥ 9.8            |         |
| Model 1                    | 1.00                                         | 1.51 (1.08,2.11) | 1.65 (1.18,2.32) | 1.55 (1.11,2.17) | 1.15 (0.80,1.63) | 0.71    |
| Model 2                    | 1.00                                         | 1.58 (1.10,2.26) | 1.75 (1.20,2.56) | 1.72 (1.15,2.58) | 1.41 (0.88,2.27) | 0.33    |
| Magnesium, <i>mg/d</i>     | ≤ 206                                        | 207 – 237        | 238 – 263        | 264 – 299        | ≥ 300            |         |
| Model 1                    | 1.00                                         | 0.95 (0.69,1.33) | 0.90 (0.64,1.27) | 0.95 (0.66,1.38) | 0.79 (0.53,1.18) | 0.27    |
| Model 2                    | 1.00                                         | 0.95 (0.68,1.34) | 0.90 (0.62,1.29) | 0.96 (0.64,1.42) | 0.77 (0.48,1.22) | 0.30    |
| Vitamin C, <i>mg/d</i>     | ≤ 57                                         | 58 – 80          | 81 – 103         | 104 – 135        | ≥ 136            |         |
| Model 1                    | 1.00                                         | 0.81 (0.59,1.12) | 0.88 (0.63,1.23) | 0.77 (0.55,1.09) | 0.94 (0.65,1.34) | 0.87    |
| Model 2                    | 1.00                                         | 0.81 (0.58,1.13) | 0.90 (0.65,1.27) | 0.75 (0.53,1.08) | 0.91 (0.63,1.32) | 0.75    |
| Vitamin E, <i>mg/d</i>     | ≤ 7.3                                        | 7.4 – 8.7        | 8.8 – 10.0       | 10.1 – 12.3      | ≥12.4            |         |
| Model 1                    | 1.00                                         | 1.19 (0.88,1.61) | 0.76 (0.55,1.06) | 0.84 (0.61,1.16) | 0.84 (0.61,1.15) | 0.11    |
| Model 2                    | 1.00                                         | 1.16 (0.85,1.59) | 0.76 (0.53,1.08) | 0.84 (0.58,1.20) | 0.82 (0.53,1.27) | 0.24    |
| β-carotene, <i>mg/d</i>    | ≤ 1.61                                       | 1.62 – 2.34      | 2.35 – 3.29      | 3.30 – 4.74      | ≥4.75            |         |
| Model 1                    | 1.00                                         | 0.89 (0.64,1.24) | 0.97 (0.70,1.35) | 1.22 (0.88,1.69) | 0.85 (0.57,1.25) | 0.78    |
| Model 2                    | 1.00                                         | 0.87 (0.62,1.21) | 0.93 (0.66,1.31) | 1.19 (0.85,1.67) | 0.81 (0.54,1.21) | 0.64    |

<sup>†</sup> Values are hazard ratios and 95% CI for risk of T2D according to quintiles of micronutrient intakes

<sup>2</sup> Statistical model 1 was adjusted for energy intake (kcal/d), age(y), sex, race-ethnicity (non-Hispanic Whites, African Americans, Hispanics and Chinese-Americans), education (<high school, high school, >high school) study center, alcohol intake (g/d), physical activity (active and inactive leisure in metabolic equivalents per min/wk), BMI (kg/m<sup>2</sup>), fiber intake (g/d), cigarette smoking (never, current or former smoker), dietary supplement use (>1/wk, yes or no); statistical model 2 was adjusted for all variables in Model 1 + ratio of polyunsaturated fat intake to saturated fat intake and mutual adjustment for Mg, Zn, heme iron, non-heme iron and antioxidants intake.

Supplemental Table 3 - HR and 95% CI for T2D by increasing quintiles of heme iron and Zn intake estimates in 4982 MESA participants, stratified by food source<sup>1,2</sup>

|                                              | Quintiles of energy-adjusted nutrient intake |                  |                  |                  |                  | <i>P</i> -trend |
|----------------------------------------------|----------------------------------------------|------------------|------------------|------------------|------------------|-----------------|
|                                              | Q1                                           | Q2               | Q3               | Q4               | Q5               |                 |
| <i>n</i>                                     | 996                                          | 997              | 996              | 996              | 997              |                 |
| Heme iron from red meat, <i>mg/d</i>         | ≤ 0.18                                       | 0.19 – 0.30      | 0.31 – 0.41      | 0.42 – 0.58      | ≥0.59            |                 |
| Model 1                                      | 1.00                                         | 1.10 (0.80,1.51) | 1.15 (0.83,1.59) | 0.94 (0.68,1.31) | 1.07 (0.78,1.47) | 0.93            |
| Model 2                                      | 1.00                                         | 1.06 (0.83,1.35) | 1.17 (0.92,1.50) | 1.27 (1.00,1.61) | 1.22 (0.94,1.58) | 0.94            |
| Heme iron from poultry and fish, <i>mg/d</i> | ≤ 0.15                                       | 0.16 – 0.26      | 0.27 – 0.36      | 0.37 – 0.52      | ≥0.53            |                 |
| Model 1                                      | 1.00                                         | 0.92 (0.66,1.29) | 1.06 (0.76,1.47) | 1.00 (0.71,1.40) | 1.16 (0.83,1.60) | 0.27            |
| Model 2                                      | 1.00                                         | 0.98 (0.69,1.38) | 1.10 (0.78,1.55) | 1.02 (0.72,1.45) | 1.25 (0.88,1.77) | 0.17            |
| Zinc from red meat, <i>mg/d</i>              | ≤ 0.54                                       | 0.55 – 0.89      | 0.90 – 1.19      | 1.20 – 1.68      | ≥1.69            |                 |
| Model 1                                      | 1.00                                         | 1.13 (0.83,1.55) | 1.00 (0.71,1.40) | 1.03 (0.74,1.43) | 1.11 (0.81,1.52) | 0.64            |
| Model 2                                      | 1.00                                         | 1.12 (0.81,1.56) | 0.99 (0.69,1.42) | 1.03 (0.72,1.49) | 1.11 (0.76,1.62) | 0.67            |
| Zinc from other sources, <i>mg/d</i>         | ≤ 5.53                                       | 5.54 – 6.41      | 6.42 – 7.19      | 7.20 – 8.41      | ≥8.42            |                 |
| Model 1                                      | 1.00                                         | 1.43 (1.02,2.00) | 1.50 (1.06,2.13) | 1.84 (1.31,2.59) | 1.07 (0.74,1.54) | 0.92            |
| Model 2                                      | 1.00                                         | 1.47 (1.03,2.10) | 1.64 (1.13,2.39) | 1.91 (1.29,2.83) | 1.31 (0.82,2.10) | 0.43            |

<sup>1</sup>Values are hazard ratios and 95 % CI for risk of T2D according to quintiles of micronutrient intakes

<sup>2</sup>Statistical model 1 was adjusted for energy intake (kcal/d), age(y), sex, race-ethnicity (non-Hispanic Whites, African Americans, Hispanics and Chinese-Americans), education (<high school, high school, >high school) study center, alcohol intake (g/d), physical activity (active and inactive leisure in metabolic equivalents per min/wk), BMI (kg/m<sup>2</sup>), fiber intake (g/d), cigarette smoking (never, current or former smoker), dietary supplement use (>1/wk, yes or no); statistical model 2 was adjusted for all variables in Model 1 + ratio of polyunsaturated fat intake to saturated fat intake, Mg, non-heme iron, antioxidants intake and mutual adjustment for total Zn, total heme iron intake.
